# Supplementary material
Source: Springer Nature journal article supplement (https://www.springermedizin.de/resource/supplementary/12943_2013_1160_MOESM7_ESM.pdf/9552616)

**a**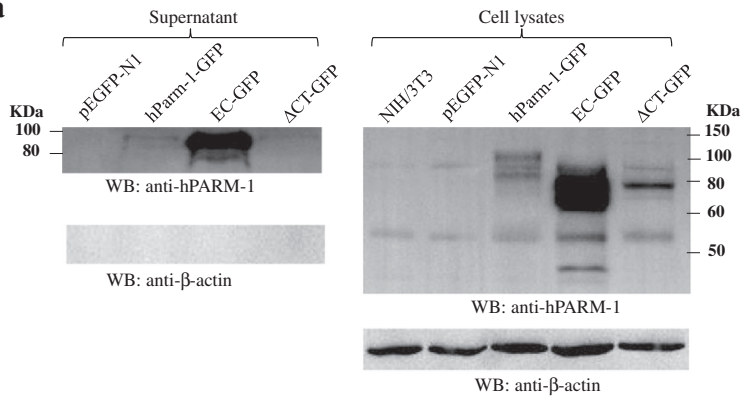**b**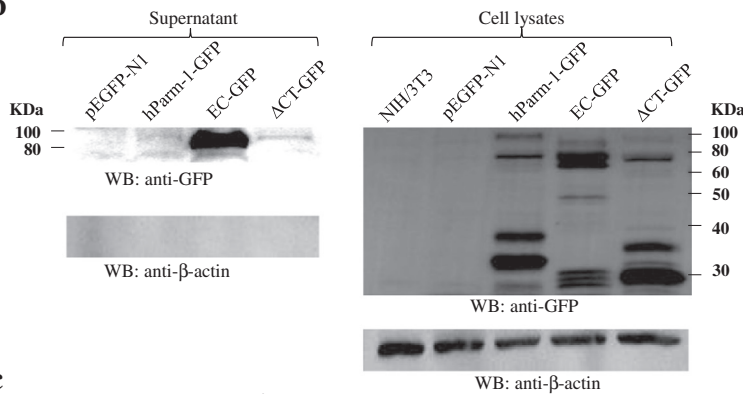**c**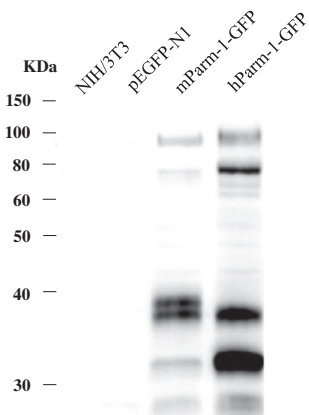

Supplement: MOESM7 [file 9552616]
